# Supplementary material
Source: ML conference proceedings conference paper supplement (https://proceedings.mlr.press/v84/chee18a.html)
Supplement: Supplementary file [file chee18a-supp.pdf]

# Convergence diagnostics for stochastic gradient descent with constant learning rate

## Supplementary material

**Theorem 1** ([3, 4]) *Under certain assumptions on the loss function, there are positive constants  $A_\gamma, B$  such that, for every  $n$ , it holds that*

$$\mathbb{E}(\|\theta_n - \theta_\star\|^2) \leq \mathbb{E}(\|\theta_0 - \theta_\star\|^2)e^{-A_\gamma n} + B\gamma.$$

**Theorem 2** *Consider SGD with constant rate,*

$$\theta_n = \theta_{n-1} - \gamma \nabla \ell(y_n, x_n^\top \theta_{n-1}).$$

*Suppose that Theorem 1 holds, so that that  $\mathbb{E}(\|\theta_n - \theta_\star\|^2) \leq \gamma M$ , for some positive  $M$  and large enough  $n$ . We make the following additional assumptions:*

- (a)  $\nabla \ell(y, x^\top \theta) = f(x, \theta) + e$ , where  $f(x, \theta)$  is  $L$ -Lipschitz,  $\mathbb{E}(e|x, \theta) = 0$  and  $\mathbb{E}(\|e\|^2) \geq \tau^2$ .
- (b) It holds  $\mathbb{E}(f(x, \theta - \gamma z)^\top z) \leq \mathbb{E}(f(x, \theta)^\top z) - \gamma K \cdot \mathbb{E}(z^\top C z)$ , for any  $\theta, z$ , for some positive constant  $K$ , and some positive definite matrix  $C$  with minimum eigenvalue  $\mu > 0$ .
- (c) It holds that  $\gamma > (L^2 M - \mu K \tau^2) / \mu K L^2 M$ .

Then,

$$\mathbb{E}(\nabla \ell(y_n, x_n^\top \theta_{n-1})^\top \nabla \ell(y_{n+1}, x_{n+1}^\top \theta_n)) < 0.$$

**Proof 2** For brevity let  $\tilde{\ell}_i = f(x_{i+1}, \theta_i) + e_i = f_i + e_i$  be the stochastic gradient at iteration  $i + 1$ .

$$\begin{aligned} \mathbb{E}(\tilde{\ell}_{i-1}^\top \tilde{\ell}_i) &= \mathbb{E} \left[ (f_{i-1} + e_{i-1})^\top (f_i + e_i) \right] = \mathbb{E} \left[ (f_{i-1} + e_{i-1})^\top f_i \right] && [ \text{because } e_i \text{ are zero-mean} ] \\ &= \mathbb{E} \left[ (f_{i-1} + e_{i-1})^\top f(\theta_{i-1} - \gamma f_{i-1} - \gamma e_{i-1}) \right] && [ \text{by SGD step for } \theta_i ] \\ &\leq \mathbb{E}(\|f_{i-1}\|^2) - \gamma K \cdot \mathbb{E} \left[ (f_{i-1} + e_{i-1})^\top C (f_{i-1} + e_{i-1}) \right] && [ \text{by Assumption (b)} ] \\ &\leq (1 - \gamma \mu K) \mathbb{E}(\|f_{i-1}\|^2) - \gamma K \cdot \mathbb{E}(\|e_{i-1}\|_C^2) \\ &\leq (1 - \gamma \mu K) L^2 \mathbb{E}(\|\theta_{i-1} - \theta_\star\|^2) - \gamma \mu K \tau^2 && [ \text{by Lipschitz Assumption (a)} ] \\ &\leq \gamma [(1 - \gamma \mu K) L^2 M - \mu K \tau^2] \\ &< 0. && [ \text{by Assumption (c) and small enough } \gamma ] \end{aligned} \tag{1}$$

*Remarks.* Assumption (b) is a form of strong convexity. For example, suppose that  $y = x^\top \theta_\star + e$ , then  $f(x, \theta) = x x^\top (\theta - \theta_\star)$  and  $f(x, \theta - \gamma z)^\top z = f(x, \theta)^\top z - \gamma z^\top \mathbb{E}(x x^\top) z$ . In this case  $C = \mathbb{E}(x x^\top)$

is the Fisher information matrix and Assumption (b) holds for  $K = 1$ . When  $\gamma$  is small enough and a Taylor approximation of  $f(x, \theta - \gamma z)$  is possible, the above result still holds for  $K = 1$  when the Fisher information exists. Assumption (c) shows that there is a threshold value for  $\gamma$  below which the diagnostic cannot terminate. For example, suppose that error noise is small so that  $\tau^2 \approx 0$  and  $K = 1$ , as argued before. Then,  $\gamma > 1/\mu$ , that is, the learning rate has to exceed the reciprocal of the minimum eigenvalue of the Fisher information matrix.

**Theorem 3** *Suppose that the loss is quadratic,  $\ell(y, x^\top \theta) = (1/2)(y - x^\top \theta)^2$ . Let  $x_1$  and  $x_2$  be two iid vectors from the distribution of  $x$ , and define:  $\sigma^2 = \mathbb{E}((y - x^\top \theta_\star)^2)$ ;  $c^2 = \mathbb{E}((x_1^\top x_2)^2)$ ;  $C = \mathbb{E}(x_1 x_2^\top (x_1^\top x_2))$ ;  $D = \mathbb{E}(x_1 x_1^\top (x_1^\top x_2)^2)$ , and suppose that all such constants are finite. Then, for  $\gamma > 0$ ,*

$$\begin{aligned} \Delta_n(\theta) &= \mathbb{E}(S_{n+2} - S_{n+1} | \theta_n = \theta) \\ &= (\theta - \theta_\star)^\top (C - \gamma D) (\theta - \theta_\star) - \gamma c^2 \sigma^2. \end{aligned}$$

**Proof 3** *For notational brevity we make the following definitions:*

$$\begin{aligned} \theta^+ &= \theta + \gamma(y_1 - x_1^\top \theta)x_1 \\ \theta^{++} &= \theta^+ + \gamma(y_2 - x_2^\top \theta^+)x_2, \end{aligned} \tag{2}$$

where  $\theta$  is the current iterate, and  $\theta^+$  and  $\theta^{++}$  are the next two using iid data  $(x_1, y_1)$  and  $(x_2, y_2)$ . For a fixed  $\theta$  we understand the Pflug diagnostic through the function

$$H(\theta) = S_{++} - S_+ | \theta = \nabla_{++} \ell^\top \nabla_+ \ell = (\theta^+ - \theta)^\top (\theta^{++} - \theta^+) / \gamma^2 \tag{3}$$

$$\text{and } \Delta_n(\theta) = \mathbb{E}(H(\theta)) = \mathbb{E} \left( (\theta^+ - \theta)^\top (\theta^{++} - \theta^+) / \gamma^2 \right). \tag{4}$$

We use Equation (2) to derive an expression for  $H$ :

$$\begin{aligned} H(\theta) &= (y_1 - x_1^\top \theta)(y_2 - x_2^\top \theta^+)x_1^\top x_2 \\ &= (y_1 - x_1^\top \theta) \left[ y_2 - x_2^\top \theta - \gamma(y_1 - x_1^\top \theta)x_1^\top x_2 \right] x_1^\top x_2 \\ &= (y_1 - x_1^\top \theta)(y_2 - x_2^\top \theta)x_1^\top x_2 - \gamma(y_1 - x_1^\top \theta)^2 (x_1^\top x_2)^2. \end{aligned} \tag{5}$$

Let  $y_i = x_i^\top \theta_\star + \varepsilon_i$ ; we know that  $\mathbb{E}((y_i - x_i^\top \theta_\star)x_i) = 0$ . Now, we analyze each term individually:

$$\begin{aligned} (y_1 - x_1^\top \theta)(y_2 - x_2^\top \theta)x_1^\top x_2 &= [x_1^\top (\theta_\star - \theta) + \varepsilon_1][x_2^\top (\theta_\star - \theta) + \varepsilon_2]x_1^\top x_2 \\ &= (\theta - \theta_\star)^\top x_1 x_2^\top (x_1^\top x_2) (\theta - \theta_\star) + \varepsilon_1 W^{(1)} + \varepsilon_2 W^{(2)} + \varepsilon_1 \varepsilon_2 W^{(3)}. \end{aligned}$$

The  $W$  variables are conditionally independent of  $\varepsilon$  and so using the law of iterated expectations these terms vanish.

$$\mathbb{E} \left( (y_1 - x_1^\top \theta)(y_2 - x_2^\top \theta)x_1^\top x_2 \right) = (\theta - \theta_\star)^\top \mathbb{E} \left( x_1 x_2^\top (x_1^\top x_2) \right) (\theta - \theta_\star) = (\theta - \theta_\star)^\top C (\theta - \theta_\star).$$

Using a similar reasoning, for the second term we have:

$$\begin{aligned} (y_1 - x_1^\top \theta)^2 (x_1^\top x_2)^2 &= \left[ (x_1^\top (\theta_\star - \theta) + \varepsilon_1 \right]^2 (x_1^\top x_2)^2 \\ &= (\theta - \theta_\star)^\top x_1 x_1^\top (x_1^\top x_2)^2 (\theta - \theta_\star) + \varepsilon_1 W^{(4)} + \varepsilon_1^2 (x_1^\top x_2)^2. \end{aligned} \tag{6}$$

In expectation of Equation (6),

$$\begin{aligned}\mathbb{E}\left((y_1 - x_1^\top \theta)^2 (x_1^\top x_2)^2\right) &= (\theta - \theta_\star)^\top \mathbb{E}(x_1 x_1^\top (x_1^\top x_2)^2) (\theta - \theta_\star) + \varepsilon_1^2 (x_1^\top x_2)^2 \\ &= (\theta - \theta_\star)^\top D (\theta - \theta_\star) + \sigma^2 c^2.\end{aligned}\tag{7}$$

By combining all results we finally get:

$$\Delta_n(\theta) = (\theta - \theta_\star)^\top (C - \gamma D) (\theta - \theta_\star) - \gamma \sigma^2 c^2.$$

**Theorem 4** Let  $\lambda_\gamma = \mathbb{E}(1/(1 + \gamma \|x\|^2)) \in (0, 1]$ . Under the assumptions of Theorem 3 applied on the implicit procedure in Equation (9), it holds that

$$\begin{aligned}\Delta_n^{\text{im}}(\theta) &= \mathbb{E}(S_{n+2} - S_{n+1} | \theta_n = \theta) \\ &= a_\gamma \Delta_n(\theta) + b_\gamma \left[ (\theta - \theta_\star)^\top D (\theta - \theta_\star) + \sigma^2 c^2 \right],\end{aligned}$$

where  $a_\gamma = \lambda_\gamma^2$ ,  $b_\gamma = \gamma \lambda_\gamma^2 (1 - \lambda_\gamma)$ .

**Proof 4** We derive similar theoretical results for  $H^{\text{im}}(\theta)$ ,  $\Delta_n^{\text{im}}(\theta)$  under the linear normal model for implicit updates. We have the implicit updates

$$\begin{aligned}\theta^+ &= \theta + \gamma (y_1 - x_1^\top \theta^+) x_1 \\ \theta^{++} &= \theta^+ + \gamma (y_2 - x_2^\top \theta^{++}) x_2\end{aligned}$$

Also note the collinearity

$$\begin{aligned}(y_1 - x_1^\top \theta^+) &= \lambda_1 (y_1 - x_1^\top \theta) \\ (y_2 - x_2^\top \theta^{++}) &= \lambda_2 (y_2 - x_2^\top \theta^+), \\ &= \lambda_2 [y_2 - x_2^\top \theta - \gamma \lambda_1 (y_1 - x_1^\top \theta) x_1^\top x_2],\end{aligned}$$

where  $\lambda_1 = 1/(1 + \gamma \|x_1\|^2)$  and  $\lambda_2 = 1/(1 + \gamma \|x_2\|^2)$ . We derive an expression for  $H^{\text{im}}$ , with implicit updates:

$$\begin{aligned}H^{\text{im}}(\theta) &= (\theta^+ - \theta)^\top (\theta^{++} - \theta^+) / \gamma^2 \\ &= (y_1 - x_1^\top \theta^+) (y_2 - x_2^\top \theta^{++}) x_1^\top x_2 \\ &= \lambda_1 \lambda_2 (y_1 - x_1^\top \theta) [y_2 - x_2^\top \theta - \gamma \lambda_1 (y_1 - x_1^\top \theta) x_1^\top x_2] x_1^\top x_2 \\ &= \lambda_1 \lambda_2 \left[ H(\theta) + \gamma (1 - \lambda_1) (y_1 - x_1^\top \theta)^2 (x_1^\top x_2)^2 \right] \\ &= \lambda_1 \lambda_2 H(\theta) + \gamma \lambda_1 \lambda_2 (1 - \lambda_1) (y_1 - x_1^\top \theta) (x_1^\top x_2)^2,\end{aligned}$$

where  $H$  is the function from the explicit update in Equation (5). The formula for  $\Delta_n^{\text{im}}(\theta)$  follows by applying expectation and the reasoning in Equation (7). Note that  $\mathbb{E}(\lambda_1 \lambda_2) = \lambda_\gamma^2$  since  $\lambda_1$  and  $\lambda_2$  are independent and have marginally identical distributions.

**Theorem 5** Consider the GLM loss defined as  $\ell(y, x^\top \theta) = -y \cdot x^\top \theta + f(x^\top \theta)$ . Let  $h(u) = f'(u)$  and suppose that  $h'(x^\top \theta) \geq k > 0$ , almost surely for all  $\theta$ . Let  $x_1, x_2$  be two iid vectors from the distribution of  $x$ . Define  $\sigma^2 = \mathbb{E}((y - h(x^\top \theta_\star))^2)$ ;  $c^2 = \mathbb{E}((x_1^\top x_2)^2)$ ;  $C(\theta, \theta_\star) = \mathbb{E}([h(x_1^\top \theta) - h(x_1^\top \theta_\star)] x_1)$ ;  $D^2(\theta, \theta_\star) = \mathbb{E}([h(x_1^\top \theta) - h(x_1^\top \theta_\star)]^2 (x_1^\top x_2)^2)$ . Then, for small enough  $\gamma$ ,

$$\begin{aligned}\Delta_n^{\text{glm}}(\theta) &= \mathbb{E}(S_{n+2} - S_{n+1} | \theta_n = \theta) \\ &\leq \|C(\theta, \theta_\star)\|^2 - \gamma k [\sigma^2 c^2 + D^2(\theta, \theta_\star)].\end{aligned}$$

**Proof 5** The updates for the GLM loss are as follows:

$$\begin{aligned}\theta^+ &= \theta + \gamma(y_1 - h(x_1^\top \theta))x_1 \\ \theta^{++} &= \theta^+ + \gamma(y_2 - h(x_2^\top \theta^+))x_2,\end{aligned}\tag{8}$$

Note that  $h(x_2^\top \theta^+) = h(x_2^\top \theta) + \gamma h'(x_2^\top \theta)(y_1 - h(x_1^\top \theta))x_1^\top x_2 + O(\gamma^2)$ . We can now follow the exact same reasoning as in Theorem 3 and that  $h'(x^\top \theta) \geq k$  almost surely.

## 1 Mean squared error bound for constant learning rate ISGD

In this section,  $\ell$  will denote likelihood, which is the negated loss (cf. Equation (9)). Thus, we have the implicit update of SGD (ISGD):

$$\theta_n = \theta_{n-1} + \gamma \nabla \ell(y_n, x_n^\top \theta_n).\tag{9}$$

We will operate under the following assumptions:

**Assumption 1** The following assumptions are true with regard to procedure in Equation (9).

- (a) Function  $\ell$  is convex, twice differentiable almost surely with respect to  $x^\top \theta$ .
- (b) For the observed Fisher information matrix  $\hat{\mathcal{I}}_n(\theta) = \nabla^2 \ell(y_n, x_n^\top \theta)$  there exists constants  $b > 0$  and  $0 < t < \infty$  such that  $b \leq \text{trace}(\hat{\mathcal{I}}_n(\theta)) \leq t$  almost surely, for all  $\theta$ . The Fisher information matrix  $\mathcal{I}(\theta_*) = \mathbb{E}(\hat{\mathcal{I}}_n(\theta_*))$  has minimum eigenvalue  $\lambda > 0$ .
- (c) There exists  $\sigma^2 > 0$  such that, for all  $n$ ,  $\mathbb{E}(\|\nabla \ell(y_n, x_n^\top \theta_*)\|^2 | \mathcal{F}_{n-1}) \leq \sigma^2$ , almost surely.
- (d) The function  $\theta \mapsto \mathbb{E}(\nabla \ell(y, x^\top \theta))$  is Lipschitz with constant  $L$ , i.e., for all  $n, \theta_1, \theta_2$ ,

$$\mathbb{E}(\|\nabla \ell(y_n; x_n^\top \theta_1) - \nabla \ell(y_n; x_n^\top \theta_2)\|^2 | \mathcal{F}_{n-1}) \leq L^2 \|\theta_1 - \theta_2\|^2.$$

- (e) Learning rate  $\gamma > 0$  is such that  $\gamma L^2(1 + \gamma t) < \lambda(1 + \gamma b)^2$ .

To prove Theorem 8, our result for the upper bound on the MSE for constant learning rate ISGD, we first prove the following results:

**Lemma 6** The gradient  $\nabla \ell$  is a scaled version of covariate  $x$ , i.e., for every  $\theta \in \mathbb{R}^p$  there is a scalar  $\lambda \in \mathbb{R}$  such that

$$\nabla \ell(y; x^\top \theta) = \lambda x$$

Thus, the gradient in the implicit update is a scaled version of the gradient calculated at the previous iterate, i.e.,

$$\nabla \ell(y_n; x_n^\top \theta_n) = \lambda_n \nabla \ell(y_n; x_n^\top \theta_{n-1}),\tag{10}$$

where the scalar  $\lambda_n$  satisfies

$$\lambda_n \ell'(y_n; x_n^\top \theta_{n-1}) = \ell'(y_n; x_n^\top \theta_{n-1} + \gamma \lambda_n \ell'(y_n; x_n^\top \theta_{n-1}) x_n^\top x_n)\tag{11}$$

**Proof 6** From the chain rule  $\nabla\ell(y_n; x_n^\top\theta_n) = \ell'(y_n; x_n^\top\theta_n)x_n$ , and similarly  $\nabla\ell(y_n; x_n^\top\theta_{n-1}) = \ell'(y_n; x_n^\top\theta_{n-1})x_n$ . Thus the two gradients are collinear. Therefore there exists a scalar  $\lambda_n$  such that

$$\ell'(y_n; x_n^\top\theta_n)x_n = \lambda_n\ell'(y_n; x_n^\top\theta_{n-1})x_n \quad (12)$$

We also have,

$$\begin{aligned} \theta_n &= \theta_{n-1} + \gamma\nabla\ell(y_n; x_n^\top\theta_n) \text{ [by definition of implicit SGD update Equation (9)]} \\ &= \theta_{n-1} + \gamma\lambda_n\ell'(y_n; x_n^\top\theta_{n-1})x_n \text{ [by chain rule and Equation(12)]} \end{aligned} \quad (13)$$

Substituting the expression for  $\theta_n$  in Equation(13) into Equation(12) we obtain the desired result of the theorem. From Equation(12) we get the equality

$$\ell'(y_n; x_n^\top\theta_n) = \lambda_n\ell'(y_n; x_n^\top\theta_{n-1}) \quad (14)$$

and substituting we get our desired result

$$\begin{aligned} \lambda_n\ell'(y_n; x_n^\top\theta_{n-1}) &= \ell'(y_n; x_n^\top(\theta_{n-1} + \gamma\lambda_n\ell'(y_n; x_n^\top\theta_{n-1})x_n)) \\ &= \ell'(y_n; x_n^\top\theta_{n-1} + \gamma\lambda_n\ell'(y_n; x_n^\top\theta_{n-1})x_n^\top x_n) \end{aligned}$$

**Lemma 7** Suppose Assumptions 1 (a), and (b) hold. Then, almost surely it holds

$$\frac{1}{1 + \gamma t} \leq \lambda_n \leq \frac{1}{1 + \gamma b} \quad (15)$$

**Proof 7** From Lemma 6 we have

$$\ell'(y_n; x_n^\top\theta_n) = \lambda_n\ell'(y_n; x_n^\top\theta_{n-1}), \quad (16)$$

where the derivative of  $\ell$  is with respect to the natural parameter  $x^\top\theta$ . Using the definition of the implicit update Equation (9),

$$\theta_n = \theta_{n-1} + \gamma\lambda_n\ell'(y_n; x_n^\top\theta_{n-1})x_n. \quad (17)$$

We substitute this definition of  $\theta_n$  into Equation(16) and perform a Taylor approximation on  $\ell'$ . Recall Taylor approximation for a function  $f$ ,  $f(x) = f(a) + f'(\xi)(x - a)$  where  $\xi$  lies in the closed interval between  $a$  and  $x$ . From Equation(17) we let  $\theta_{n-1} = a$  and  $\gamma\lambda_n\ell'(y_n; x_n^\top\theta_{n-1})x_n = (x - a)$ . Also, by the Chain rule  $\frac{\delta}{\delta\theta}\ell'(y; x^\top\theta) = \ell''(y; x^\top\theta)x^\top$ . Thus we obtain,

$$\begin{aligned} \ell'(y_n; x_n^\top\theta_n) &= \ell'(y_n; x_n^\top\theta_{n-1}) + \ell''(y_n; x_n^\top\tilde{\theta})x_n^\top \cdot \gamma\lambda_n\ell'(y_n; x_n^\top\theta_{n-1})x_n \\ &= \ell'(y_n; x_n^\top\theta_{n-1}) + \gamma\lambda_n\ell''(y_n; x_n^\top\tilde{\theta})\ell'(y_n; x_n^\top\theta_{n-1})x_n^\top x_n \end{aligned} \quad (18)$$

where  $\tilde{\theta} = \delta\theta_{n-1} + (1 - \delta)\theta_n$  and  $\delta \in [0, 1]$ .

By combining Equation(16) with Equation(18) and cancelling out the first derivative term we get

$$\begin{aligned} \lambda_n &= 1 + \gamma\lambda_n\ell''(y_n; x_n^\top\tilde{\theta})x_n^\top x_n \\ \lambda_n(1 - \gamma\ell''(y_n; x_n^\top\tilde{\theta})\|x\|^2) &= 1 \\ (1 + \gamma \text{trace}(\hat{\mathcal{I}}_n(\tilde{\theta})))\lambda_n &\leq 1 \text{ [where } \hat{\mathcal{I}} \text{ is the observed Fisher information]} \end{aligned} \quad (19)$$

$$(1 + \gamma b)\lambda_n \leq 1 \text{ [By Assumption 1 (b)]} \quad (20)$$

Now we get the other bound,

$$(1 + \gamma t)\lambda_n \geq 1 \text{ [By Assumption 1 (b)]}$$

**Theorem 8** Suppose that Assumptions 1(a) - (e) hold. Then,

$$\mathbb{E}(\|\theta_n - \theta_*\|^2) \leq \left(1 - \frac{2\gamma\lambda}{1 + \gamma t} + \frac{2\gamma^2 L^2}{(1 + \gamma b)^2}\right)^n \mathbb{E}(\|\theta_{n-1} - \theta_*\|^2) \quad (21)$$

$$+ \frac{\gamma\sigma^2(1 + \gamma t)}{\lambda(1 + \gamma b)^2 - \gamma L^2(1 + \gamma t)} \quad (22)$$

**Proof 8** Starting from the implicit update (9), we have

$$\begin{aligned} \theta_n - \theta_* &= \theta_{n-1} - \theta_* + \gamma \nabla \ell(y_n; x_n^\top \theta_n) \\ \theta_n - \theta_* &= \theta_{n-1} - \theta_* + \gamma \lambda_n \nabla \ell(y_n; x_n^\top \theta_{n-1}) \quad [\text{By Lemma 6}] \\ \|\theta_n - \theta_*\|^2 &= \|\theta_{n-1} - \theta_*\|^2 \\ &\quad + 2\gamma \lambda_n (\theta_{n-1} - \theta_*)^\top \nabla \ell(y_n; x_n^\top \theta_{n-1}) \\ &\quad + \|\gamma \lambda_n \nabla \ell(y_n; x_n^\top \theta_{n-1})\|^2 \end{aligned} \quad (23)$$

To bound the last term,

$$\begin{aligned} &\|\gamma \lambda_n \nabla \ell(y_n; x_n^\top \theta_{n-1})\|^2 \\ &= \gamma^2 \lambda_n^2 \|\nabla \ell(y_n; x_n^\top \theta_{n-1})\|^2 \\ &= \gamma^2 \lambda_n^2 \|\nabla \ell(y_n; x_n^\top \theta_{n-1}) - \nabla \ell(y_n; x_n^\top \theta_*) + \nabla \ell(y_n; x_n^\top \theta_*)\|^2 \\ &\leq 2\gamma^2 \lambda_n^2 \|\nabla \ell(y_n; x_n^\top \theta_{n-1}) - \nabla \ell(y_n; x_n^\top \theta_*)\|^2 + 2\gamma^2 \lambda_n^2 \|\nabla \ell(y_n; x_n^\top \theta_*)\|^2 \\ &\leq 2 \left(\frac{\gamma}{1 + \gamma b}\right)^2 \left(\|\nabla \ell(y_n; x_n^\top \theta_{n-1}) - \nabla \ell(y_n; x_n^\top \theta_*)\|^2 + \|\nabla \ell(y_n; x_n^\top \theta_*)\|^2\right) \\ &\quad [\text{By Lemma 7}] \end{aligned} \quad (24)$$

Taking expectation of both sides of Equation(24),

$$\begin{aligned} &\mathbb{E}(\|\gamma \lambda_n \nabla \ell(y_n; x_n^\top \theta_{n-1})\|^2) \\ &\leq 2 \left(\frac{\gamma}{1 + \gamma b}\right)^2 \left[\mathbb{E}(\|\nabla \ell(y_n; x_n^\top \theta_{n-1}) - \nabla \ell(y_n; x_n^\top \theta_*)\|^2) + \mathbb{E}(\|\nabla \ell(y_n; x_n^\top \theta_*)\|^2)\right] \\ &\leq 2 \left(\frac{\gamma}{1 + \gamma b}\right)^2 (L^2 \|\theta_{n-1} - \theta_*\|^2 + \sigma^2) \quad [\text{By Lipschitz and gradient bound, Assumption 1 (c), (d)}] \end{aligned} \quad (25)$$

We can bound the expectation of the second term as

$$\begin{aligned} &\mathbb{E}(2\lambda_n \gamma (\theta_{n-1} - \theta_*)^\top \nabla \ell(y_n; x_n^\top \theta_{n-1})) \\ &\geq \frac{2\gamma}{1 + \gamma t} \mathbb{E} \left( (\theta_{n-1} - \theta_*)^\top \nabla \ell(y_n; x_n^\top \theta_{n-1}) \right) \quad [\text{By Lemma 7}] \\ &\geq \frac{2\gamma}{1 + \gamma t} \mathbb{E} \left( (\theta_{n-1} - \theta_*)^\top \nabla h(\theta_{n-1}) \right) \quad [\text{where } \nabla h(\theta_{n-1}) = \mathbb{E}(\nabla \ell(y_n; x_n^\top \theta_{n-1}) | \mathcal{F}_{n-1})] \\ &\leq -\frac{2\gamma\lambda}{1 + \gamma t} \mathbb{E}(\|\theta_{n-1} - \theta_*\|^2) \quad [\text{By strong convexity, Assumption 1 (b)}] \end{aligned} \quad (26)$$

Taking expectations in (23) and substituting inequalities (25) and (26) into (23), and again taking expectation, yields the recursion,

$$\mathbb{E}(\|\theta_n - \theta_*\|^2) \leq \left(1 - \frac{2\gamma\lambda}{1 + \gamma t} + \frac{2\gamma^2 L^2}{(1 + \gamma b)^2}\right) \mathbb{E}(\|\theta_{n-1} - \theta_*\|^2) + 2 \left(\frac{\gamma\sigma}{1 + \gamma b}\right)^2 \quad (27)$$

Let  $\delta_n \equiv \mathbb{E}(\|\theta_n - \theta_*\|^2)$ . We can now derive the bound of the theorem as follows:

$$\begin{aligned} \delta_n &\leq \left(1 - \frac{2\gamma\lambda}{1+\gamma t} + \frac{2\gamma^2 L^2}{(1+\gamma b)^2}\right)^n \delta_0 + \sum_{k=1}^{\infty} 2 \left(\frac{\gamma\sigma}{1+\gamma b}\right)^2 \cdot \left(1 - \frac{2\gamma\lambda}{1+\gamma t} + \frac{2\gamma^2 L^2}{(1+\gamma b)^2}\right)^k \\ &= \left(1 - \frac{2\gamma\lambda}{1+\gamma t} + \frac{2\gamma^2 L^2}{(1+\gamma b)^2}\right)^n \delta_0 + 2 \left(\frac{\gamma\sigma}{1+\gamma b}\right)^2 \cdot \left(\frac{2\gamma\lambda}{1+\gamma t} - \frac{2\gamma^2 L^2}{(1+\gamma b)^2}\right)^{-1} \\ &= \left(1 - \frac{2\gamma\lambda}{1+\gamma t} + \frac{2\gamma^2 L^2}{(1+\gamma b)^2}\right)^n \delta_0 + \frac{\gamma\sigma^2(1+\gamma t)}{\lambda(1+\gamma b)^2 - \gamma L^2(1+\gamma t)} \end{aligned}$$

**Lemma 9** Suppose that Assumption 1(e) holds. The discount factor of the non-asymptotic bound in Theorem 8 will be bounded  $0 < \cdot < 1$  for all  $\gamma > 0$ , and thus the mean squared error  $\mathbb{E}(\|\theta_n - \theta_*\|^2)$  will contract for all possible values of  $\gamma$ . In addition the stationary term will be  $> 0$  for all  $\gamma > 0$ .

**Proof 9** The discount factor is bounded below by  $\left(1 - \frac{2\gamma\lambda}{1+\gamma b} + \frac{2\gamma^2 L^2}{(1+\gamma b)^2}\right)$  because  $b \leq t$ . We will show that this term is bounded below by 0.

A quick manipulation of the algebra gives us

$$\text{(lower bound)} \quad 2\gamma\lambda(1+\gamma b) - 2\gamma^2 L^2 < (1+\gamma b)^2 \quad (28)$$

$$\text{(upper bound)} \quad \gamma L^2(1+\gamma t) < \lambda(1+\gamma b)^2 \quad (29)$$

$$\text{(stationary bound)} \quad \gamma L^2(1+\gamma t) < \lambda(1+\gamma b)^2 \quad (30)$$

Both the upper bound and stationary bound are satisfied by Assumption 1 (e). Further manipulating the lower bound, from Equation(28),

$$\begin{aligned} 2\gamma\lambda + 2\gamma^2\lambda b - 2\gamma^2 L^2 &< 1 + 2\gamma b + \gamma^2 b^2 \\ \gamma^2(b^2 - 2\lambda b + 2L^2) + \gamma(2b - 2\lambda) + 1 &> 0 \end{aligned} \quad (31)$$

Solving the equality of Equation(31) (with the quadratic equation) gives us

$$\begin{aligned} &\frac{(2\lambda - 2b) \pm \sqrt{(2b - 2\lambda)^2 - 4(b^2 - 2\lambda b + 2L^2)}}{2(b^2 - 2\lambda b + 2L^2)} \\ &= \frac{(2\lambda - 2b) \pm \sqrt{(4b^2 - 8\lambda b + 4\lambda^2) - 4b^2 + 8\lambda b - 8L^2}}{2(b^2 - 2\lambda b + 2L^2)} \\ &= \frac{(2\lambda - 2b) \pm \sqrt{4\lambda^2 - 8L^2}}{2(b^2 - 2\lambda b + 2L^2)} \\ &= \frac{(\lambda - b) \pm \sqrt{\lambda^2 - 2L^2}}{(b^2 - 2\lambda b + 2L^2)} \end{aligned}$$

Recall that for a second-degree polynomial of the form  $a_2x^2 + a_1x + 1$ , the convexity is determined by  $a_2$ . Because  $L \geq \lambda$  (a standard assumption), the discriminant  $(\lambda^2 - 2L^2) < 0$  and thus there are no real roots. Looking at the convexity,

$$(b^2 - 2\lambda b + 2L^2) > (b^2 - 2\lambda b + \lambda^2) = (b - \lambda)^2 > 0$$

The strict inequality is because of the following. For all observed Fisher information matrices, (with  $p$  the dimesnion)

$$\text{trace}(\hat{\mathcal{I}}_n(\theta)) \geq b \Rightarrow \mathbb{E}\text{trace}(\hat{\mathcal{I}}_n(\theta)) \geq b \Rightarrow \lambda \cdot p \geq b$$

Thus for all  $\gamma \in \mathbb{R}$  the lower bound represented by Equation(28) is satisfied. We have zero real roots and a convex function.

## References

- [1] Jyrki Kivinen, Manfred K Warmuth, and Babak Hassibi. The p-norm generalization of the lms algorithm for adaptive filtering. *Signal Processing, IEEE Transactions on*, 54(5):1782–1793, 2006.
- [2] Brian Kulis and Peter L Bartlett. Implicit online learning. In *Proceedings of the 27th International Conference on Machine Learning (ICML-10)*, pages 575–582, 2010.
- [3] Eric Moulines and Francis R Bach. Non-asymptotic analysis of stochastic approximation algorithms for machine learning. In *Advances in Neural Information Processing Systems*, pages 451–459, 2011.
- [4] Deanna Needell, Rachel Ward, and Nati Srebro. Stochastic gradient descent, weighted sampling, and the randomized kaczmarz algorithm. In *Advances in Neural Information Processing Systems*, pages 1017–1025, 2014.
- [5] Panos Toulis, Jason Rennie, and Edoardo Airoldi. Statistical analysis of stochastic gradient methods for generalized linear models. In *31st International Conference on Machine Learning*, 2014.
